# Supplementary material for: Olea Europaea Geminivirus: A Novel Bipartite Geminivirid Infecting Olive Trees
Source: MDPI journal article supplement (doi:10.3390/v13030481), 2021-03-15
Supplement: s1 [file s1]

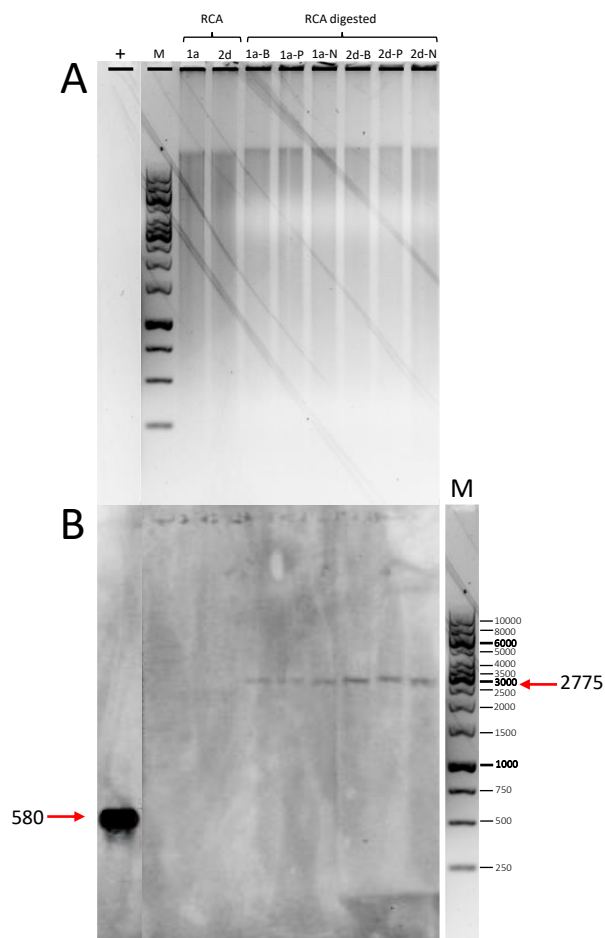

**Supplementary Figure 2.** Southern blot assay of DNA preparations from OEGV-infected samples hybridized with a specific DNA-A probe. The 1% agarose gel used for the transfer is in the upper panel (A), while in (B) the Southern blot hybridization is showed. Lane 1, DNA-A amplicon used as positive control in a final concentration of 2 ng. Lane 2 (M) GeneRuler 1 kb DNA Ladder (ThermoFisher); lane 3, 4, RCA undigested products obtained from CTAB extracts of samples 1a and 2d; lanes 5-10, RCA products digested with the single cut restriction enzymes Bam-HI (B), PstI (P) and NcoI (N). Red arrows indicate the hybridized 580bp PCR amplicon used as positive control and the linearized 2775 bp full-length DNA-A genomic component.
