# Supplementary material for: Olea Europaea Geminivirus: A Novel Bipartite Geminivirid Infecting Olive Trees
Source: Viruses. 2021 Mar 15;13(3):481. doi: 10.3390/v13030481 (PMC8000510; doi:10.3390/v13030481)
Supplement: Supplementary file 1 [file viruses-13-00481-s001.zip]

Archive with 6 entries (6 files):
- Supplementary Figure 1 - Graphical representation of the identity matrix of OEGV with the top 100 complete geminivirid genome hits obtained in BLASTn.bmp
- Supplementary Figure 2 - Southern Blot.pdf
- Supplementary Figure 3 - Library and OEGV mapping siRNA size class distribution histograms.pdf
- Supplementary table 1 - Table of Primers.docx
- Supplementary table 2 - Identity Matrix.xlsx
- Supplementary table 3 - Survey.xlsx
