# Supplementary material for: Olea Europaea Geminivirus: A Novel Bipartite Geminivirid Infecting Olive Trees
Source: Viruses. 2021 Mar 15;13(3):481. doi: 10.3390/v13030481 (PMC8000510; doi:10.3390/v13030481)
Supplement: Supplementary file 1 [file viruses-13-00481-s001.zip › Supplementary table 2 - Identity Matrix.xlsx]

## Sheet: Geminiviruses related to Olive 
SDT identity matrix of the MUSCLE alignment of the first 100 BLASTnn hits of OEGV. For each sequence, the genus and the virus name with its Genbank accession number has been reported. OEGV pairwise identity scores are highlighted in yellow
Genus	Virus name with its accesion number
Begomovirus	MN013408.1_Pepper_huasteco_yellow_vein_virus_isolate_Colima_segment_DNAA_partial_sequence	100
Begomovirus	LN848869.1_Pepper_huasteco_yellow_vein_virus_segment_DNAA_complete_sequence_isolate_CER26W2009	97	100
Begomovirus	LN848863.1_Pepper_huasteco_yellow_vein_virus_segment_DNAA_complete_sequence_isolate_TUL510W2009	95.9	96.5	100
Begomovirus	LN848862.1_Pepper_huasteco_yellow_vein_virus_segment_DNAA_complete_sequence_isolate_TUL59W2009	96	96.6	99.9	100
Begomovirus	LN848871.1_Pepper_huasteco_yellow_vein_virus_segment_DNAA_complete_sequence_isolate_CER44C2009	96	96.4	98.8	98.9	100
Begomovirus	LN848870.1_Pepper_huasteco_yellow_vein_virus_segment_DNAA_complete_sequence_isolate_CER43C2009	95.8	96	98.5	98.6	99	100
Begomovirus	KP890827.2_Pepper_huasteco_yellow_vein_virus_clone_LV2004GveCap9_segment_DNAA_complete_sequence	95.6	95.3	97.4	97.4	97.5	97.4	100
Begomovirus	LN848872.1_Pepper_huasteco_yellow_vein_virus_segment_DNAA_complete_sequence_isolate_CER58L2004	95.6	95.7	97.1	97.1	97.2	97.1	96.1	100
Begomovirus	LN848865.1_Pepper_huasteco_yellow_vein_virus_segment_DNAA_complete_sequence_isolate_TUL2001L2000	96	95.2	96.3	96.4	96.4	96.3	95.9	96.8	100
Begomovirus	LN848856.1_Pepper_huasteco_yellow_vein_virus_segment_DNAA_complete_sequence_isolate_BER111W2004	95.7	95.6	96.7	96.8	96.8	96.8	96.2	97.3	98.7	100
Begomovirus	KY366177.1_Pepper_huasteco_yellow_vein_virus_isolate_GESCB42HUAS_replication_protein__rep__gene_partial_cds	95.7	95.3	94.4	94.6	94.3	94	94.2	94.6	93.8	94.1	100
Begomovirus	GU128150.1_Pepper_huasteco_yellow_vein_virus_isolate_Guanajuato1_segment_DNA_A_complete_sequence	95.9	94.1	93.8	93.9	93.8	93.6	93.1	93.4	93.5	93.3	98	100
Begomovirus	DQ083764.1_Pepper_yellow_leaf_curl_Indonesia_virus_isolate_Bogor_complete_genome	70.9	69.2	69.5	69.5	69	69.5	69.5	69.5	69.8	69.7	69.9	70	100
Begomovirus	DQ083765.1_Pepper_yellow_leaf_curl_Indonesia_virus_isolate_Bogor_tomato_complete_genome	71.2	69.1	69.7	69.7	69.8	69.7	69.8	69.6	70.2	70.2	69.8	70.3	99.2	100
Begomovirus	LC051112.1_Pepper_yellow_leaf_curl_Indonesia_virus_DNA_segment_DNAA_complete_sequence_isolate__PepYLCIVBA_A61	70.7	69.7	68.9	68.9	69.4	69.3	69.7	69	69.5	69.6	69.3	69.8	93.9	93.7	100
Begomovirus	KT992047.1_Tobacco_leaf_curl_virus_isolate_KH7_complete_genome	68.8	67.2	67.6	67.7	67.1	66.6	66.7	66.9	67.5	66.8	69.6	68.4	70	70.1	69	100
Begomovirus	HQ189431.1_Honeysuckle_yellow_vein_virus_isolate_DJ_complete_genome	68.6	67.1	66.8	66.9	66.9	66.7	66.7	66.6	67	66.7	70	68.2	69.9	70.3	70	97.9	100
Begomovirus	KT992046.1_Tobacco_leaf_curl_virus_isolate_KH6_complete_genome	69	66.8	67.4	67.5	67.2	66.5	66.3	66.7	67.1	66.9	69.6	68.3	70	70.1	69	97.2	96.7	100
Begomovirus	HM164547.2_Honeysuckle_yellow_vein_virus_complete_sequence	68.8	67.2	67.5	67.6	67.2	67.5	66.6	66.9	67	66.8	70.2	69.2	69.9	70	69	96.3	96.5	96.4	100
Begomovirus	HM164549.1_Tobacco_leaf_curl_virus_isolate_TLCVKoreaSC2_complete_genome	67.5	66.1	66	66.1	66.1	65.8	65.8	66.3	66.4	66.9	69.6	67.9	69.7	70.2	68.3	94.8	95	94.9	95.4	100
Begomovirus	HM164541.1_Tobacco_leaf_curl_virus_isolate_TLCVKoreaIS4_complete_genome	68.7	66.7	67.9	67.9	67.5	67	67.2	67.2	68.3	67.7	69.7	68.5	70.3	70.6	68.9	94.7	94.7	95.2	95.5	97	100
Begomovirus	HM164545.1_Honeysuckle_yellow_vein_virus_complete_sequence	68.5	67.2	66.7	66.8	66.9	66.9	66.3	67.3	67.6	68	68.6	68.3	70.6	70.1	69.9	93.8	94.2	94	93.8	93.2	93.2	100
Begomovirus	FJ434943.1_Honeysuckle_yellow_vein_virus_complete_sequence	68.4	66.8	66.8	66.9	66.7	66.4	66.6	66.9	67.4	66.9	69.2	68.4	70.6	70.3	69.4	93	93.4	93.4	93.1	95	95.2	96.4	100
Begomovirus	AB055009.1_Honeysuckle_yellow_vein_virus_DNA_complete_genome_isolate__TLCVKK	69.5	67.3	67.4	67.5	67.4	67.1	66.5	67.1	67.6	67.6	70.1	68.1	70.6	70.8	70.9	89.6	90.1	89.8	89.4	91.1	91.7	90.5	92.8	100
Begomovirus	AB287440.1_Honeysuckle_yellow_vein_virus_DNA_complete_genome_isolate__Nara1	68.3	67.1	66.6	66.7	66.5	66.4	66.2	66.4	67.3	67.4	69.2	68.5	70.6	70.5	69.9	87	86.9	87	86.8	87.9	88.5	87.9	89.6	89	100
Begomovirus	AB108832.1_Honeysuckle_yellow_vein_mosaic_virus_V1_C3_C2_genes_for_coat_protein_replication_enhancer_protein_transcriptional_transactivator_protein_complete_cds_isolate__TK10	68.7	66.2	66.5	66.5	66.5	66.2	65.8	65.5	65.9	65.9	54.7	67.3	68.3	68.4	68	86.4	86.4	86.7	86.3	86.2	86.6	86.4	86.2	85.9	94.5	100
Begomovirus	AB287441.1_Honeysuckle_yellow_vein_virus_DNA_complete_genome	69.6	68.4	67.2	67.3	67.3	66.6	66.8	67.2	67.2	67.3	70.1	69	69.8	69.8	69.8	87.8	87.7	87.8	87.6	87	87.5	88.7	88.1	87.1	94.8	93.9	100
Begomovirus	AB182261.1_Honeysuckle_yellow_vein_virus_DNA_complete_genome_isolate__SP1	69	67.2	67.1	67.2	67.1	66.9	66.6	67	67	66.8	68.6	68.4	69.8	70	69.7	86.5	86.6	86.4	86.2	86.3	87.3	87.3	87.4	87	92.1	93.2	92.9	100
Begomovirus	AB178948.1_Honeysuckle_yellow_vein_mosaic_virus_DNA_complete_genome_isolate_OT2	68.3	67	66.1	66.2	66.1	65.9	65.9	66.1	65.9	66.2	69.1	67.8	69.6	69.8	69.1	87.9	87.9	88	87.7	89.8	89.8	88.5	90.3	89.6	92.1	91.7	90.7	89.8	100
Begomovirus	AB108829.1_Honeysuckle_yellow_vein_mosaic_virus_V1_C3_C2_genes_for_coat_protein_replication_enhancer_protein_transcriptional_transactivator_protein_complete_cds_isolate__OT2	69.2	67.1	67	67	67.3	66.8	65.9	66	66.1	66.6	55.6	68	67.9	67.6	67.9	86.4	86.4	86.5	86.3	86.2	86.2	86.8	86.4	86.9	90.9	90.3	90.4	90.3	97.1	100
Begomovirus	AB178945.1_Honeysuckle_yellow_vein_virus_DNA_complete_genome_isolate__FK1	68.6	66.7	66.8	66.9	66.2	66.9	65.8	66.5	66.3	66.6	69.7	68.8	69.4	69.5	69	87.8	87.7	87.8	87.5	89.5	89.7	88.3	90.2	89.5	92.3	91.7	90.9	89.7	99	96.8	100
Begomovirus	AB020781.1_Honeysuckle_yellow_vein_mosaic_virus_genes_for_V2_protein_coat_protein_C3_protein_C2_protein_replicationassociated_protein_C4_protein_complete_cds	69.2	68.3	67.8	67.9	67.9	67.7	67.6	67.8	67.7	67.7	70	68.9	69.8	69.6	69.1	89.4	89.3	89.5	89	88.8	89.2	89.3	89.6	89.3	92.1	92.2	92.3	90.7	96.8	95.5	96.5	100
Begomovirus	AB079765.1_Honeysuckle_yellow_vein_virus_DNA_complete_genome_isolate__TLCVY	69.1	67.6	67.1	67.2	67.3	66.6	66.3	67.2	67.5	67.4	68.9	69.5	70.5	71	70.7	88	88.1	88	87.5	87.8	88	88.4	88.6	90.4	91.2	92	90.6	90.3	92.1	92	91.9	93.8	100
Begomovirus	AB108836.1_Honeysuckle_yellow_vein_mosaic_virus_V1_C3_C2_genes_for_coat_protein_replication_enhancer_protein_transcriptional_transactivator_protein_complete_cds_isolate__KM23	69.4	66.5	65.8	65.8	66.6	65.7	65.9	65.1	65.9	65.4	54.7	68	68.4	68.8	68.7	87.3	87.5	87.3	87.5	87.2	87.6	87.5	87.4	87.8	92.9	91.2	92.9	92.6	93.3	91.8	93.2	93.2	94.2	100
Begomovirus	AB108834.1_Honeysuckle_yellow_vein_mosaic_virus_V1_C3_C2_genes_for_coat_protein_replication_enhancer_protein_transcriptional_transactivator_protein_complete_cds_isolate__KM21	70.1	67.2	67	67	67.9	67.1	66.7	67.1	67.5	67.2	58.6	68	68.3	68.8	68.5	86.1	86.4	86.3	86.2	85.9	86.1	86.8	86.8	86.5	91.5	90.6	91.1	90.7	93	91.3	93.1	93.2	92.3	91.6	100
Begomovirus	AB108831.1_Honeysuckle_yellow_vein_mosaic_virus_V1_C3_C2_genes_for_coat_protein_replication_enhancer_protein_transcriptional_transactivator_protein_complete_cds_isolate__KG6	68.9	67	66.2	66.2	66.3	66.5	65.5	65.1	65.8	66.3	55.9	67.1	68.1	67.8	68.2	85.5	85.6	85.2	85.4	85	85.2	85.7	85.5	86.8	90.7	90.4	90.4	90	93.1	91.8	92.9	92.7	91.7	90.3	92.4	100
Begomovirus	AB108837.1_Honeysuckle_yellow_vein_mosaic_virus_V1_C3_C2_genes_for_coat_protein_replication_enhancer_protein_transcriptional_transactivator_protein_complete_cds_isolate__KM25	69.5	66.9	66.6	66.6	66.7	66.1	65.8	65.6	66.1	65	54.7	68.5	68.5	69.1	69.1	87	87	87	86.6	86.3	86.9	86.9	87.1	89.4	92.2	92	91.8	91.1	93.9	92.7	94.1	93.6	95.2	93.2	91.9	93	100
Begomovirus	AB108828.1_Honeysuckle_yellow_vein_mosaic_virus_V1_C3_C2_genes_for_coat_protein_replication_enhancer_protein_transcriptional_transactivator_protein_complete_cds_isolate__NG1	70	67.6	65.2	65.2	65.5	65.4	65.1	66	66	65.8	54.1	68.7	68.7	68.7	68.3	90.6	91.2	90.7	90.6	91.1	90.9	91.3	91.1	90.8	88.9	88	88.7	88.1	91.7	89.9	91.1	91.8	89.9	89.5	89.2	88.5	89.2	100
Begomovirus	AB055008.1_Tobacco_leaf_curl_Japan_virus[JP2]_DNA_complete_genome_isolate__TLCVJp2	68.8	66.5	67	67.1	66.8	66.7	66.1	66.7	66.8	66.7	68.1	68.2	69.8	69.9	69.1	88.1	87.9	87.7	87.7	89.2	89.5	88.9	90.1	89.5	90.3	87.8	89.2	86.9	87.8	84.7	87.9	87.2	86.1	84.8	84.8	84.9	85.3	88.7	100
Begomovirus	AB079689.1_Honeysuckle_yellow_vein_virus_DNA_complete_genome_isolate__TLCVJp3	69	66.9	66.6	66.7	66.8	66.8	66.4	66.9	67.2	67	68.1	68.6	70.1	70.2	69.3	88.3	88.2	88.1	88	89.6	90	89.3	90.5	89.6	90.7	88	89.6	87	88.1	84.9	88.1	87.5	86.5	84.8	84.8	85	85.3	88.6	98.9	100
Begomovirus	AB028604.1_Tobacco_leaf_curl_Japan_virus_V1_V2_C3_C2_C1_C4_genes_complete_cds	70.1	68.4	67.8	67.9	68.2	67.1	67.2	67.9	68.1	68	69.7	68.9	69.9	69.8	69.6	89.2	89.1	88.9	88.8	88.4	88.7	90	89.4	88.7	90.5	88.4	93.9	87.8	87.2	84.9	87.3	88.5	86.9	85.4	85.5	85.4	85.9	89.2	95.1	94.9	100
Begomovirus	EF620536.1_Tobacco_leaf_curl_Japan_virus_complete_genome	68.5	66.8	67.2	67.3	67	66.7	66.2	66.2	66.8	66.8	69.9	68.1	69.9	70.1	69.1	88.5	88.3	88.3	88.2	89.5	90.1	89.1	90.4	89.8	90.2	89.7	88.5	86.9	87.4	85.1	87.4	87.1	86.8	85	85.5	84.8	86.1	89.4	92.6	93	90.9	100
Begomovirus	AB287439.1_Honeysuckle_yellow_vein_virus_DNA_complete_genome_isolate__Honeysuckle_Ibaraki	68.4	66.5	67.2	67.2	67	66.9	66.1	66.8	67	66.8	70.1	68.6	69.7	70.1	69.1	88.4	88.5	88.3	88.3	89.5	90.4	89.6	90.6	90	90.1	89.9	88.7	87.2	87.4	85.1	87.4	87.1	86.9	85	85.4	84.8	86.1	89.3	92.3	92.8	90.9	98.4	100
Begomovirus	AB236323.1_Honeysuckle_yellow_vein_mosaic_virus[Japan_Miyazaki_2000]_DNA_complete_genome	68.1	66.4	66	66	66.4	65.8	65.5	66.3	66.6	66.8	67.7	66.7	69.6	69.6	69.5	87.5	87.3	87.4	87.1	87.3	87.6	87.7	88.3	88.3	87.6	85.2	86.7	86.6	89	87.4	88.9	89.9	90.4	86.5	89.4	88	86.3	86.8	86.6	86.9	86.4	86.9	87	100
Begomovirus	AB178949.1_Honeysuckle_yellow_vein_Kagoshima_virus_DNA_complete_genome_isolate__KG5TOB	68.5	67	66.9	67	66.9	66.8	66.1	67	67.4	67	69.3	68.7	69.4	69.5	69.1	86.7	86.5	87	86.4	87.9	88.4	86.8	88.8	89.3	89.3	87	87.5	87	90	89.9	90	89.9	88.8	87.3	90.1	89.5	88.2	88.6	87.9	88.3	86.9	88.3	88.6	91.7	100
Begomovirus	AB236321.1_Honeysuckle_yellow_vein_virus[Japan_Fukui_2000]_DNA_complete_genome	69.4	68.2	67.7	67.8	68.3	68.3	68	67.8	68.5	68.3	69.1	68.6	70.3	70.6	70.2	88.1	88.5	88.6	88	88.3	89.1	89	89.3	90	86.4	85.2	86.4	92	87.2	86.1	87.2	88	88.1	89.6	85.7	85.2	87.7	89.4	86.8	87	87.2	87	87.1	87.4	86.8	100
Begomovirus	AM503104.1_Malvastrum_leaf_curl_Guangdong_virus_complete_genome_isolate_FJ3	69.8	68.5	68.6	68.6	68.6	69	68.8	68.6	67.9	68.4	69.7	69.2	71.9	72.1	72.2	75.5	75.7	75.1	75.3	74.7	74.8	75.2	75.4	74.8	74	73.2	75.5	73.9	74.2	73.6	74.7	74.7	74.6	74.3	73.5	73.1	74.6	74.6	74	73.7	74.9	74.3	74.8	74.2	73.3	74.4	100
Begomovirus	FJ712189.1_Malvastrum_leaf_curl_virus_segment_A_complete_sequence	71	69.8	69.1	69.1	69.1	69	68.9	69.4	68.5	69	70.1	69.5	71.1	71	71.2	74.7	74.8	74.9	75.3	74.9	75.3	75	75.6	74.6	74.2	73.3	74.4	75.5	74.8	74	75	75	74.6	74.3	74.5	73.2	74.9	74.8	74.1	74.3	74	74.2	74.5	74.7	73.4	76	90.9	100
Begomovirus	EF554783.1_Malvastrum_leaf_curl_virus_isolate_Fujian_segment_A_complete_sequence	70.9	69.5	68.9	69	69.3	69.4	69	69.1	68.6	68.6	70.8	69.8	70.7	70.8	70.8	75.1	75.4	74.8	75.1	75.1	75.2	75.1	75.7	75	74	73.4	74.1	75	74.6	73.8	74.8	74.8	74.6	74.1	73.7	73.4	74.7	74.4	73.7	73.8	73.6	74.4	74.7	74.7	73.2	75.7	93.1	96.6
Begomovirus	NC_038454.1_Premna_leaf_curl_virus_isolate_VN7_segment_DNAA_complete_sequence	70.8	70.1	69.4	69.5	68.8	68.7	68.6	68.7	69.4	69.1	71.1	70.7	70.2	70.2	70.8	74.7	74.8	74.9	75.6	74.8	74.9	75.1	75.3	75.6	75.1	72.9	75.1	75	74.8	73	74.7	75.3	75.9	73.4	73.7	72.2	73.1	73	74.5	74.6	75.1	75	74.8	74.9	74.9	75.9	78.9	78
Begomovirus	EU487027.2_Tomato_leaf_curl_Philippines_virus_isolate_P7_complete_genome	69.8	68.4	69.3	69.3	69	69	69.2	68.8	68.9	68.9	71.2	69.2	73	72.5	72.9	73.5	73.4	73.2	73.7	71.8	72.7	73.5	72.7	73	72.5	70.7	73.9	72.5	71.7	70.1	71.9	73.2	72.4	70.6	71	69.9	71.3	71.9	71.9	71.8	73.3	72.2	72.4	72.3	71.6	73.3	78.5	76.5
Begomovirus	DQ866128.1_Tomato_leaf_curl_Taiwan_virus_isolate_LJC142_segment_DNA_A_complete_sequence	70.6	69.5	69.5	69.6	69.2	68.9	68.3	68.8	68.9	69.2	71.2	69.8	71	71	70.4	74.4	74.6	74.3	74.3	73.9	74.7	74.4	74.7	74.9	73.6	73.2	74.3	76	74.3	72.7	74.2	75	74.5	73.5	73.2	71.8	73.5	73.7	73.7	73.5	74.1	73.7	73.7	74	73.4	76.8	79.4	84.3
Begomovirus	GU723726.1_Tomato_leaf_curl_Taiwan_virus_isolate_H42_segment_DNAA_complete_sequence	69.8	68.2	68.4	68.5	68.7	67.6	67.5	68.6	68	68.7	71.1	69.3	70.7	70.7	69.8	76.2	76.4	75.9	76	76	76.4	76.5	76.8	76.6	75.4	72.9	76	75.6	75.9	72.6	75.8	76.3	76	73.3	73	71.5	73.3	73.6	75.4	75.3	76.2	75.3	75.7	75.6	75.1	76.3	78	78
Begomovirus	DQ866122.1_Tomato_leaf_curl_Taiwan_virus_isolate_FD22_segment_DNA_A_complete_sequence	69.5	68.4	68.4	68.5	68.7	67.8	68	68.4	68.6	68.8	71.5	69.5	70.6	71.1	70.1	76.4	76.9	76.2	76.6	76.2	76.5	76.6	76.7	76.7	75.9	73.5	76.5	76	76.1	72.5	76.1	76.6	76.4	73.8	73.4	72.2	73.8	74.2	75.7	75.7	76.4	75.7	75.7	75.8	75.2	76.3	78.2	78.3
Begomovirus	U88692.1_Tomato_leaf_curl_virus__Taiwan_complete_genome	69.4	68.1	68.4	68.5	68.7	67.7	67.9	68.5	68.3	68.7	70.7	69.1	71.2	71.1	70.1	76.5	77	76.1	76.7	76.4	76.9	76.8	77.2	77	76	73.7	76.7	76	76.5	73.2	76.5	77	76.7	74	73.6	72.4	74.2	74.4	75.7	76	76.6	75.9	76.1	76	75.5	76.6	78.6	78.9
Begomovirus	JX128098.1_Tomato_leaf_curl_Taiwan_virus_isolate_ZC00_segment_DNAA_complete_sequence	69.4	68.7	68.1	68.2	68.4	67.6	67.9	68.3	67.9	68.4	71.3	69.7	70.2	70.1	69.3	76	76.2	76	76.1	75.9	76.7	76.3	76.8	76.2	75.4	73.2	76.1	75.7	75.9	72.6	75.8	76.2	76	73.3	73	71.8	73.5	73.7	75.3	75.1	76	75.4	75.4	75.4	75.3	76.2	77.7	78
Begomovirus	JX128094.1_Tomato_leaf_curl_Taiwan_virus_isolate_YG1_segment_DNAA_complete_sequence	69.6	68.3	68.2	68.2	68.5	67.8	67.9	68.3	68.2	68.7	71.5	69.5	70.4	70.2	69.4	76.1	76.5	76.2	76.1	76	76.9	76.5	76.8	76.3	75.5	73.3	76.4	75.9	76	72.6	75.9	76.3	76.2	73.5	73	71.9	73.6	73.7	75.3	75.3	76.2	75.5	75.4	75.5	75.2	76.3	77.7	78
Begomovirus	KP195719.1_Tomato_leaf_curl_Taiwan_virus_isolate_ZLT03_segment_DNAA_complete_sequence	69.6	68.3	68.3	68.4	68.5	67.9	67.4	68.3	68.2	68.7	71.1	69.6	70.4	70.3	69.8	76.1	76.4	76	76.2	75.9	76.6	76.6	76.5	76.3	75.7	73.2	76.4	75.8	75.9	72.7	75.8	76.4	76.3	73.6	73.3	71.9	73.6	73.8	75.4	75.2	76.2	75.5	75.3	75.5	75.3	76.3	77.9	78
Begomovirus	KJ850343.1_Tomato_leaf_curl_Taiwan_virus_isolate_BL00_segment_DNAA_complete_sequence	69.8	68.4	68.4	68.5	68.7	68	67.5	68.3	68.3	68.8	71.2	69.7	70.4	70.3	69.7	76	76.3	75.9	76.1	75.8	76.5	76.5	76.5	76.3	75.6	73	76.4	75.8	75.9	72.5	75.8	76.3	76.2	73.4	73.1	71.7	73.4	73.6	75.3	75.1	76.1	75.4	75.3	75.4	75.1	76.2	78	78.2
Begomovirus	JX128096.1_Tomato_leaf_curl_Taiwan_virus_isolate_BY00_segment_DNAA_complete_sequence	69.7	68.5	68.6	68.6	69	68.1	68.2	68.5	68.4	68.9	71.6	69.8	70.5	70.3	69.5	76	76.2	75.8	75.9	75.6	76.4	76.2	76.5	75.9	75.2	73.4	76.1	75.7	75.8	72.7	75.9	76.2	75.9	73.7	73.3	71.8	73.6	73.7	75.2	75.2	75.9	75.4	75.1	75.2	74.9	76.1	77.7	77.9
Begomovirus	KC810891.1_Tomato_leaf_curl_Taiwan_virus_isolate_ZLT02_segment_DNAA_complete_sequence	69.8	68.1	68.5	68.6	68.9	68	68.2	68.4	68	68.4	71.5	69.5	70.5	70.4	69.5	76.1	76.3	75.9	76	75.7	76.5	76.3	76.6	76.1	75.2	73.2	76.1	75.7	75.8	72.7	75.7	76.2	76.1	73.7	73.2	72	73.5	73.8	75.4	75.4	76.1	75.4	75.1	75.4	75	76.2	77.7	77.9
Begomovirus	AM698112.1_Tomato_leaf_curl_Taiwan_virus_complete_genome_isolate_ZJ20	69.4	67.9	67.9	68	68.3	67.5	67.1	68	67.7	68.2	70.7	69	70.4	70.2	69.4	76	76.1	75.7	75.8	75.7	76.5	76.1	76.4	75.9	75.2	73.1	76	75.5	75.6	72.5	75.5	76	75.8	73.4	73.2	71.6	73.3	73.6	75.2	75.1	75.9	75.3	75.1	75.2	74.9	75.9	77.9	78
Begomovirus	JX982137.1_Tomato_leaf_curl_Taiwan_virus_isolate_XN00_segment_DNAA_complete_sequence	69.4	67.8	67.8	67.9	68.2	67.3	67.1	67.8	68.1	68.4	71.4	69.4	70.1	70.1	69.6	76.2	76.4	76.1	76.1	76.1	76.8	76.4	76.9	76.4	75.7	73.5	76.6	76	76	72.8	76	76.6	76.4	73.7	73.4	72	73.6	74	75.7	75.5	76.3	75.6	75.5	75.6	75.4	76.5	77.6	78
Begomovirus	JX128097.1_Tomato_leaf_curl_Taiwan_virus_isolate_ZLT00_segment_DNAA_complete_sequence	69.6	68.3	68	68.1	68.4	67.6	67.3	68.1	68.1	68.3	71.6	69.5	70.2	70.1	69.3	76	76.2	75.8	75.8	75.8	76.3	76.2	76.5	75.9	75.4	73.1	76.3	75.7	75.3	72.3	75.3	76.1	75.9	73.2	72.8	71.8	73.2	73.5	75.1	75	76.1	75.3	75.2	75.3	74.9	76	78	78
Begomovirus	JX128095.1_Tomato_leaf_curl_Taiwan_virus_isolate_JF00_segment_DNAA_complete_sequence	69.5	67.9	67.8	67.8	68.2	67.3	67	67.9	67.7	68.2	70.9	69.2	70.1	70	69.3	75.8	76	75.6	75.6	75.5	76.2	75.9	76.3	76.1	75.2	73.2	76.1	75.5	75.5	72.5	75.5	76.1	76	73.5	73.2	71.9	73.5	73.7	75.1	74.9	75.9	75.2	75.1	75.1	75	76	77.4	77.8
Begomovirus	DQ237918.1_Tomato_leaf_curl_Taiwan_virus_isolate_BS_segment_DNAA_complete_sequence	69.8	68.3	68.4	68.4	68.7	67.9	67.5	68.5	67.9	68.4	71.1	69.3	70.7	70.5	70	76.2	76.4	76.1	76.1	75.9	76.8	76.5	76.8	76.5	75.6	73.3	76.3	75.9	76	72.9	75.9	76.5	76.2	73.8	73.5	72.2	73.9	74	75.3	75.2	76.1	75.4	75.3	75.3	75.3	76.4	78.4	78.3
Begomovirus	GU723721.1_Tomato_leaf_curl_Taiwan_virus_isolate_H71_segment_DNAA_complete_sequence	69.4	68.6	68.2	68.3	68.5	67.6	67.4	68.3	67.9	68.3	71.4	69.3	70.7	70.5	70	75.8	75.9	75.7	75.9	75.5	76.4	76.2	76.5	76.3	75.3	73.2	76.2	75.5	75.7	72.7	75.6	76.3	75.8	73.4	73.2	72	73.4	73.9	75.1	75.1	75.8	75.2	75.2	75.2	74.9	76.1	78.3	78.3
Begomovirus	DQ866127.1_Tomato_leaf_curl_Taiwan_virus_isolate_T1_segment_DNA_A_complete_sequence	69.9	68.2	68.3	68.4	68.4	67.8	67.3	68.4	68.1	68.5	71.3	69.5	70.5	70.4	69.6	76.1	76.2	76.1	76	75.9	76.5	76.4	76.8	76.4	75.6	73.4	76.3	75.8	76	72.9	75.9	76.4	76	73.8	73.5	72.1	73.8	73.9	75.4	75.3	76.2	75.4	75.3	75.4	75.1	76.5	77.7	78.1
Begomovirus	GU723723.1_Tomato_leaf_curl_Taiwan_virus_isolate_H81_segment_DNAA_complete_sequence	70	68.5	68.6	68.6	68.9	68.1	67.7	68.7	68.2	68.9	71.3	69.4	70.8	70.7	69.8	76	76.4	75.9	76.2	75.9	76.2	76.4	76.7	76.7	75.6	73.1	76.2	75.8	76.1	72.6	76	76.5	76.4	73.5	73.3	71.9	73.5	73.8	75.2	75.2	76.3	75.7	75.6	75.5	75.5	76.4	78	78.5
Begomovirus	GU723714.1_Tomato_leaf_curl_Taiwan_virus_isolate_YL71_segment_DNAA_complete_sequence	69.4	67.9	68.3	68.4	68.6	67.8	67.2	68.4	67.8	68.5	70.1	69.2	70.7	70.6	69.6	76.5	76.8	76.3	76.3	76.4	76.6	76.8	77.1	76.6	75.8	73.4	76.3	76.1	76.3	72.9	76.1	76.6	76.6	73.8	73.5	72	73.7	73.9	75.4	75.4	76.3	75.8	75.6	75.8	75.5	76.6	78.1	78.5
Begomovirus	GU723709.1_Tomato_leaf_curl_Taiwan_virus_isolate_NT14_segment_DNAA_complete_sequence	69.9	68.3	68.4	68.5	68.5	67.9	67.8	68.5	68	68.7	70.9	69.5	70.9	70.7	69.8	76.4	76.5	76.1	76.3	76.4	76.6	76.8	77.1	76.7	75.8	73.4	76.2	76.1	76.4	72.8	76.3	76.7	76.5	73.7	73.4	72	73.7	73.8	75.6	75.6	76.3	76	75.9	75.6	75.5	76.6	77.8	78.4
Begomovirus	GU723708.1_Tomato_leaf_curl_Taiwan_virus_isolate_NT11_segment_DNAA_complete_sequence	70	68.4	68.6	68.6	68.6	68.1	67.8	68.6	68.1	68.8	71.1	69.7	70.9	70.7	69.8	76.4	76.6	76.2	76.3	76.4	76.6	76.8	77.1	76.7	75.8	73.4	76.3	76.2	76.4	72.8	76.3	76.8	76.4	73.7	73.3	72	73.6	73.7	75.6	75.6	76.3	76.1	75.9	75.6	75.6	76.7	77.8	78.4
Begomovirus	KJ850342.1_Tomato_leaf_curl_Taiwan_virus_isolate_SS02_segment_DNAA_complete_sequence	69.9	68.4	68.7	68.8	69	68.2	67.9	68.7	68.3	69	70.3	69.5	70.7	70.5	69.5	76.1	76.4	76	76	75.9	76.6	76.5	76.8	76.4	75.6	73.1	76.4	75.8	76	72.6	75.8	76.3	76.3	73.5	73.2	71.8	73.5	73.9	75.5	75.5	76.3	75.4	75.3	75.6	75.3	76.2	77.8	78.3
Begomovirus	JQ867094.1_Tomato_leaf_curl_Taiwan_virus_isolate_PY1_complete_genome	69.8	68.3	68.6	68.6	68.9	68.1	67.8	68.5	68.2	68.9	70.7	69.4	70.7	70.6	69.5	76.1	76.4	76	76.1	76	76.4	76.5	76.8	76.5	75.7	73.1	76.4	75.9	76	72.6	75.8	76.4	76.3	73.5	73.2	71.8	73.5	73.9	75.3	75.4	76.3	75.5	75.3	75.6	75.4	76.4	77.8	78.3
Begomovirus	KC810893.1_Tomato_leaf_curl_Taiwan_virus_isolate_SS00_segment_DNAA_complete_sequence	69.7	68.2	68.5	68.6	68.9	68.1	67.8	68.5	68.2	68.8	71.1	69.3	70.6	70.5	69.4	76.2	76.4	76	76.1	76	76.6	76.6	76.8	76.3	75.4	73.1	76.4	75.9	76	72.6	75.9	76.4	76.4	73.5	73.2	71.8	73.5	73.9	75.3	75.4	76.3	75.5	75.3	75.6	75.5	76.4	77.9	78.2
Begomovirus	KP195720.1_Tomato_leaf_curl_Taiwan_virus_isolate_NS02_segment_DNAA_complete_sequence	69.8	68.5	68.4	68.5	68.9	68	68.2	68.5	68.1	68.7	71.3	69.1	70.8	70.8	69.7	76.2	76.7	76.3	76.3	76.1	76.5	76.7	77	76.5	75.7	73.3	76.2	76	76.3	72.8	76.1	76.6	76.5	73.7	73.3	72.1	73.8	73.9	75.4	75.3	76.3	75.6	75.4	75.7	75.4	76.6	78.1	78.4
Begomovirus	KP195718.1_Tomato_leaf_curl_Taiwan_virus_isolate_BS02_segment_DNAA_complete_sequence	69.9	68.4	68.4	68.5	68.8	68	67.7	68.5	68.1	68.8	70.9	69.3	70.7	70.6	69.5	76.3	76.6	76.1	76.3	76.2	76.5	76.7	76.9	76.5	75.7	73.3	76.3	76.1	76.3	72.7	76.1	76.6	76.5	73.6	73.2	72	73.7	73.6	75.4	75.4	76.2	75.7	75.5	75.6	75.6	76.5	78.1	78.4
Begomovirus	GU723713.1_Tomato_leaf_curl_Taiwan_virus_isolate_871_segment_DNAA_complete_sequence	70	68.6	68.6	68.7	68.8	68.2	67.7	68.6	68.3	68.9	71.9	69.8	70.7	70.6	69.6	76.2	76.6	76.2	76.3	76.3	76.7	76.7	77.1	76.6	75.7	73.2	76.4	76.1	76.4	72.7	76.3	76.5	76.4	73.7	73.4	72	73.6	73.9	75.3	75.4	76.3	75.8	75.6	75.7	75.7	76.6	78	78.5
Begomovirus	FN256292.1_Tomato_leaf_curl_Taiwan_virus_ZJWZ5_complte_genome_isolate_ZJWZ5	69.9	68.5	68.6	68.7	69	68.2	67.9	68.7	68.4	69.1	71.4	69.6	70.9	70.7	69.7	76.3	76.7	76.3	76.3	76.1	76.5	76.8	77	76.7	75.8	73.2	76.5	76	76.2	72.7	76.1	76.6	76.4	73.7	73.4	72	73.6	73.9	75.4	75.5	76.4	75.7	75.5	75.7	75.7	76.6	78.1	78.4
Begomovirus	EU624503.1_Tomato_leaf_curl_Taiwan_virus_isolate_HKT1_segment_DNAA_complete_sequence	70.1	68.6	68.7	68.8	68.8	68.2	68.1	68.6	68.2	68.9	71.5	69.9	71	70.9	69.8	76.4	76.7	76.3	76.4	76.2	76.6	76.8	77.1	76.8	75.9	73.3	76.4	76.1	76.3	72.8	76.1	76.7	76.6	73.6	73.7	72	73.6	73.9	75.6	75.6	76.4	75.8	75.6	76	75.7	76.7	78	78.4
Begomovirus	GU723719.1_Tomato_leaf_curl_Taiwan_virus_isolate_NH1066_segment_DNAA_complete_sequence	70.1	68.5	68.8	68.8	68.7	67.9	67.6	68.5	68.2	69	71.2	69.6	70.7	70.6	69.6	76.3	76.6	76.2	76.3	76.2	76.6	76.7	77.1	76.7	75.8	73	76.3	76.1	76.1	72.5	76.1	76.6	76.5	73.4	73	71.6	73.3	73.6	75.4	75.4	76.2	75.7	75.5	75.7	75.7	76.6	78.1	78.3
Begomovirus	GU723718.1_Tomato_leaf_curl_Taiwan_virus_isolate_NH1061_segment_DNAA_complete_sequence	70.2	68.7	68.7	68.8	69.1	68.2	68	68.7	68.4	69.2	71.2	69.7	70.8	70.7	69.7	76.5	76.8	76.4	76.5	76.4	76.8	76.9	77.3	76.9	75.9	73.3	76.5	76.2	76.3	72.8	76.3	76.8	76.7	73.7	73.3	72	73.7	73.9	75.6	75.6	76.4	75.9	75.7	75.9	75.9	76.8	78.1	78.4
Begomovirus	GU723716.1_Tomato_leaf_curl_Taiwan_virus_isolate_LS5_segment_DNAA_complete_sequence	69.9	68.3	68.4	68.5	68.8	68	67.7	68.5	68.2	68.9	70.8	69.6	71	70.8	69.7	76.2	76.6	76.2	76.2	76.1	76.5	76.7	76.9	76.6	75.6	73.2	76.2	76.1	76.2	72.8	76	76.7	76.4	73.7	73.3	72	73.7	73.9	75.3	75.3	76.2	75.6	75.4	75.6	75.6	76.6	78.1	78.3
Begomovirus	GU723710.1_Tomato_leaf_curl_Taiwan_virus_isolate_LY5_segment_DNAA_complete_sequence	70.1	68.6	68.6	68.7	68.9	68.1	67.8	68.7	68.4	69.2	71.2	69.6	70.9	70.8	69.9	76.2	76.8	76	76.5	76.4	76.5	76.6	76.9	76.5	75.6	73	76.3	76	76.2	73.1	76.2	76.7	76.4	73.8	73.4	72	73.7	74	75.3	75.3	76.2	75.7	75.3	75.8	75.7	76.6	78	78.2
Begomovirus	GU723712.1_Tomato_leaf_curl_Taiwan_virus_isolate_J18_segment_DNAA_complete_sequence	69.8	68.3	68.4	68.4	68.5	67.9	67.4	68.3	68	68.7	71.1	69.3	70.6	70.5	69.9	76.4	76.7	76.3	76.4	76.1	76.5	76.6	76.9	77	75.7	73.2	76.4	76.2	76.2	72.8	76.1	76.6	76.4	73.6	73.2	71.8	73.5	73.7	75.4	75.4	76.3	75.7	75.5	75.6	75.7	76.6	78.1	78.3
Begomovirus	DQ866130.1_Tomato_leaf_curl_Taiwan_virus_isolate_KD_segment_DNA_A_complete_sequence	68.5	68.5	68	68.1	68.3	67.2	66.8	68.2	67.7	68.4	70.1	68.9	70.2	70.1	69.8	76.6	76.8	76.3	76.6	76.5	77	76.8	77.1	77.2	75.8	73.2	76.5	76	76.1	73	76.1	76.5	76.5	73.9	73.3	72.1	74	74.2	75.7	75.6	76.4	75.6	75.8	76.1	75.5	76.7	78.7	78.8
Begomovirus	GU723729.1_Tomato_leaf_curl_Taiwan_virus_isolate_T21_segment_DNAA_complete_sequence	69.2	68.6	67.9	68	68.3	67.3	67.1	68.2	67.9	68.4	70.4	69.1	70.1	70.1	69.8	76.1	76.3	75.8	76.1	76.1	76.5	76.3	76.7	77.2	75.4	72.7	76.2	75.6	75.9	73.1	75.9	76.3	76.1	73.8	72.4	71.6	73.6	74.2	75.2	75.2	76	75.1	75.4	75.4	74.8	76.5	78.7	78.5
Begomovirus	GU723728.1_Tomato_leaf_curl_Taiwan_virus_isolate_T36_segment_DNAA_complete_sequence	69.2	68.5	67.9	68	68.3	67.3	67.1	68.3	67.9	68.4	70.7	69.2	70.1	70.2	69.7	76.1	76.3	75.9	76.1	76.1	76.5	76.3	76.7	77.2	75.5	72.8	76.3	75.7	76	73	76	76.4	76.1	73.7	72.4	71.6	73.6	74.1	75.1	75.1	76.1	75.2	75.5	75.6	75	76.5	78.7	78.6
Begomovirus	GU723727.1_Tomato_leaf_curl_Taiwan_virus_isolate_T33_segment_DNAA_complete_sequence	69.1	68.5	67.9	68	68.3	67.3	67	68.3	67.8	68.3	70.5	69.1	70.1	69.7	69.3	76	76.2	75.8	76	75.9	76.4	76.1	76.5	77	75.3	72.6	76.1	75.5	75.8	72.9	75.8	76.2	76	73.6	72.3	71.5	73.5	74	75	75	76.1	75.2	75.4	75.4	74.8	76.3	78.6	78.9
Begomovirus	GU723724.1_Tomato_leaf_curl_Taiwan_virus_isolate_H85_segment_DNAA_complete_sequence	68.9	68.5	68	68.1	68.4	67.3	66.8	68.3	67.9	68.7	70.7	69	70.2	70.3	69.8	76.3	76.5	76.1	76.3	76.2	76.6	76.6	76.8	76.9	75.6	72.8	76.6	75.9	76	73	76	76.5	76.1	74	72.5	71.6	73.6	74.2	75.5	75.5	76.2	75.3	75.8	75.9	75.3	76.6	78.6	78.5
Begomovirus	DQ866129.1_Tomato_leaf_curl_Taiwan_virus_isolate_HT7_segment_DNA_A_complete_sequence	69.5	68.4	68.2	68.3	68.4	67.6	67.6	68.3	68	68.2	71.6	69.6	70.6	70.4	69.8	76.3	76.8	75.9	76.5	76.2	76.2	76.3	76.5	76.8	75.6	73.2	76.3	75.6	76.2	73.3	76	76.7	76.5	73.7	73.5	72.2	74.2	74.1	75.2	75.3	76.3	75.1	75.4	75.6	74.8	76.1	78.5	78.3
Begomovirus	GU723722.1_Tomato_leaf_curl_Taiwan_virus_isolate_H73_segment_DNAA_complete_sequence	69.4	68.2	67.7	67.7	68	67	66.9	67.8	67.4	67.6	70.7	68.8	71	70.9	70.2	76.8	77.2	76.3	77.1	76.3	76.7	76.9	76.9	77.6	75.8	72.8	76.4	76.1	76.1	72.7	76.3	76.9	76.7	73.6	73.1	71.9	73.5	74	76	76	76.6	75.7	75.6	76.3	75.5	76.9	77.9	78.6
Begomovirus	GU723725.1_Tomato_leaf_curl_Taiwan_virus_isolate_H91_segment_DNAA_complete_sequence	69.1	68.1	67.2	67.3	67.6	67.5	66.8	67.6	67.3	67.4	70.4	68.6	70.5	70.4	69.8	76.9	77.3	76.6	77.2	76.5	76.8	76.9	77	77.1	76	73.2	76.6	76.3	76.2	72.9	76.4	77	76.8	73.9	73.5	72.1	73.8	74.3	75.8	75.9	76.3	75.7	75.6	76.2	75.5	76.8	78.2	78.7
Begomovirus	DQ866123.1_Tomato_leaf_curl_Taiwan_virus_isolate_GT64_segment_DNA_A_complete_sequence	69.4	68.3	67.9	68	68.2	67.2	67.3	67.9	67.9	68	70.5	68.8	70.9	70.8	70.3	77.1	77.4	76.6	77.3	76.6	76.9	77.1	77.2	77.5	76.1	73.3	76.8	76.5	76.4	73.2	76.6	77.1	77	74.1	73.7	72.4	74.1	74.2	76	76.1	76.6	75.9	75.8	76.4	75.7	77.1	78.1	78.7
Begomovirus	GU723717.1_Tomato_leaf_curl_Taiwan_virus_isolate_LS8_segment_DNAA_complete_sequence	69.4	68.5	68	68	68.1	67.6	67.1	68	67.9	68	70.6	69	70.9	70.9	70.2	76.8	77.2	76.5	77.1	76.5	76.7	76.9	77	76.8	75.9	73.2	76.4	76.3	76.6	73	76.5	77	76.8	73.6	73.5	72.1	73.8	74.2	76.1	76.2	76.6	75.7	75.7	76.3	75.2	77	78.3	78.8
Begomovirus	GU723715.1_Tomato_leaf_curl_Taiwan_virus_isolate_YL78_segment_DNAA_complete_sequence	69.3	68.4	67.9	68	68	67.6	67	67.9	67.6	67.8	70.4	68.9	70.9	70.8	69.9	76.8	77.1	76.9	77.1	76.4	76.7	76.9	77	76.7	75.7	73	76.3	76.1	76.1	72.8	76.4	76.9	76.7	73.5	73.2	71.9	73.6	74	76	76.1	76.4	75.4	75.6	76.3	75.3	76.8	77.9	78.6
Begomovirus	GU723730.1_Tomato_leaf_curl_Taiwan_virus_isolate_T24_segment_DNAA_complete_sequence	68.9	68.2	67.9	67.9	68.1	67.1	67.5	67.7	67.7	68	70.5	68.7	70.6	70.4	70	76.7	77	76.5	77	76.5	76.9	76.8	77.1	77.3	75.6	72.7	76.2	76	76.1	72.7	76.3	76.7	76.6	73.3	73	71.7	74	73.8	76	75.9	76.4	75.6	75.7	76.6	75.7	77	78.6	79.1
Begomovirus	GU723720.1_Tomato_leaf_curl_Taiwan_virus_isolate_YL1031_segment_DNAA_complete_sequence	69.4	68.9	68.1	68.2	68.2	67.6	67.6	68.2	67.8	68.1	71.7	69.4	70.4	70.4	69.8	76	76.1	75.4	76.1	76.1	76.5	76.3	76.6	76.2	75.3	73.1	76.1	75.6	75.8	72.8	75.9	76.2	76	73.5	73.3	71.9	73.5	74.1	75.5	75.8	76.3	75.3	75.4	75.7	75.2	76	78.2	78.9
Begomovirus	NC_043526.1_Jacquemontia_yellow_vein_virus_isolate_1915_clone_1_segment_DNAA_complete_sequence	69.4	69.9	69.8	70	69.9	69.7	69.8	69.2	68.9	68.8	65.8	69.9	66.1	66.6	65.9	65.3	65.8	65.5	65.5	65.4	65.4	65.5	65.7	66	65.6	68.2	66.4	66.6	65.5	67.6	65.3	65.8	66.9	68.1	68.7	67.4	68.6	66.6	66.2	65.8	66.3	65.6	65.5	65.6	65.9	65.4	67.4	67.8
Begomovirus	KY624376.1_Jacquemontia_yellow_vein_virus_isolate_1915_clone_2_segment_DNAA_complete_sequence	69.3	69.8	69.7	69.9	69.8	69.6	69.7	69.1	68.8	68.7	65.7	69.8	66.6	66.6	65.8	65.3	65.8	65.5	65.4	65.3	65.5	65.5	65.7	66.1	65.7	68.2	66.4	66.6	65.5	67.5	65.3	65.8	67.2	68.1	68.6	67.3	68.6	66.6	66.2	65.8	66.4	65.6	65.5	65.6	65.9	65.5	67.4	67.8
	Olea_europaea_geminivirus_DNAA	60.6	59.6	60.2	60.2	61.3	60.2	60.6	59.8	59.8	59.5	61.6	60.1	58.8	58.3	59.1	59.1	59.7	58.5	58.1	58.2	58.8	58.5	58.8	59.2	57.1	60.8	58.8	58.2	58.3	61.9	59.3	58	59.5	60.3	62.5	62.7	62	59.2	59.1	59.1	58.2	59.4	60.2	59.2	58.5	58.9	59	60
		MN013408.1_Pepper_huasteco_yellow_vein_virus_isolate_Colima_segment_DNAA_partial_sequence	LN848869.1_Pepper_huasteco_yellow_vein_virus_segment_DNAA_complete_sequence_isolate_CER26W2009	LN848863.1_Pepper_huasteco_yellow_vein_virus_segment_DNAA_complete_sequence_isolate_TUL510W2009	LN848862.1_Pepper_huasteco_yellow_vein_virus_segment_DNAA_complete_sequence_isolate_TUL59W2009	LN848871.1_Pepper_huasteco_yellow_vein_virus_segment_DNAA_complete_sequence_isolate_CER44C2009	LN848870.1_Pepper_huasteco_yellow_vein_virus_segment_DNAA_complete_sequence_isolate_CER43C2009	KP890827.2_Pepper_huasteco_yellow_vein_virus_clone_LV2004GveCap9_segment_DNAA_complete_sequence	LN848872.1_Pepper_huasteco_yellow_vein_virus_segment_DNAA_complete_sequence_isolate_CER58L2004	LN848865.1_Pepper_huasteco_yellow_vein_virus_segment_DNAA_complete_sequence_isolate_TUL2001L2000	LN848856.1_Pepper_huasteco_yellow_vein_virus_segment_DNAA_complete_sequence_isolate_BER111W2004	KY366177.1_Pepper_huasteco_yellow_vein_virus_isolate_GESCB42HUAS_replication_protein__rep__gene_partial_cds	GU128150.1_Pepper_huasteco_yellow_vein_virus_isolate_Guanajuato1_segment_DNA_A_complete_sequence	DQ083764.1_Pepper_yellow_leaf_curl_Indonesia_virus_isolate_Bogor_complete_genome	DQ083765.1_Pepper_yellow_leaf_curl_Indonesia_virus_isolate_Bogor_tomato_complete_genome	LC051112.1_Pepper_yellow_leaf_curl_Indonesia_virus_DNA_segment_DNAA_complete_sequence_isolate__PepYLCIVBA_A61	KT992047.1_Tobacco_leaf_curl_virus_isolate_KH7_complete_genome	HQ189431.1_Honeysuckle_yellow_vein_virus_isolate_DJ_complete_genome	KT992046.1_Tobacco_leaf_curl_virus_isolate_KH6_complete_genome	HM164547.2_Honeysuckle_yellow_vein_virus_complete_sequence	HM164549.1_Tobacco_leaf_curl_virus_isolate_TLCVKoreaSC2_complete_genome	HM164541.1_Tobacco_leaf_curl_virus_isolate_TLCVKoreaIS4_complete_genome	HM164545.1_Honeysuckle_yellow_vein_virus_complete_sequence	FJ434943.1_Honeysuckle_yellow_vein_virus_complete_sequence	AB055009.1_Honeysuckle_yellow_vein_virus_DNA_complete_genome_isolate__TLCVKK	AB287440.1_Honeysuckle_yellow_vein_virus_DNA_complete_genome_isolate__Nara1	AB108832.1_Honeysuckle_yellow_vein_mosaic_virus_V1_C3_C2_genes_for_coat_protein_replication_enhancer_protein_transcriptional_transactivator_protein_complete_cds_isolate__TK10	AB287441.1_Honeysuckle_yellow_vein_virus_DNA_complete_genome	AB182261.1_Honeysuckle_yellow_vein_virus_DNA_complete_genome_isolate__SP1	AB178948.1_Honeysuckle_yellow_vein_mosaic_virus_DNA_complete_genome_isolate_OT2	AB108829.1_Honeysuckle_yellow_vein_mosaic_virus_V1_C3_C2_genes_for_coat_protein_replication_enhancer_protein_transcriptional_transactivator_protein_complete_cds_isolate__OT2	AB178945.1_Honeysuckle_yellow_vein_virus_DNA_complete_genome_isolate__FK1	AB020781.1_Honeysuckle_yellow_vein_mosaic_virus_genes_for_V2_protein_coat_protein_C3_protein_C2_protein_replicationassociated_protein_C4_protein_complete_cds	AB079765.1_Honeysuckle_yellow_vein_virus_DNA_complete_genome_isolate__TLCVY	AB108836.1_Honeysuckle_yellow_vein_mosaic_virus_V1_C3_C2_genes_for_coat_protein_replication_enhancer_protein_transcriptional_transactivator_protein_complete_cds_isolate__KM23	AB108834.1_Honeysuckle_yellow_vein_mosaic_virus_V1_C3_C2_genes_for_coat_protein_replication_enhancer_protein_transcriptional_transactivator_protein_complete_cds_isolate__KM21	AB108831.1_Honeysuckle_yellow_vein_mosaic_virus_V1_C3_C2_genes_for_coat_protein_replication_enhancer_protein_transcriptional_transactivator_protein_complete_cds_isolate__KG6	AB108837.1_Honeysuckle_yellow_vein_mosaic_virus_V1_C3_C2_genes_for_coat_protein_replication_enhancer_protein_transcriptional_transactivator_protein_complete_cds_isolate__KM25	AB108828.1_Honeysuckle_yellow_vein_mosaic_virus_V1_C3_C2_genes_for_coat_protein_replication_enhancer_protein_transcriptional_transactivator_protein_complete_cds_isolate__NG1	AB055008.1_Tobacco_leaf_curl_Japan_virus[JP2]_DNA_complete_genome_isolate__TLCVJp2	AB079689.1_Honeysuckle_yellow_vein_virus_DNA_complete_genome_isolate__TLCVJp3	AB028604.1_Tobacco_leaf_curl_Japan_virus_V1_V2_C3_C2_C1_C4_genes_complete_cds	EF620536.1_Tobacco_leaf_curl_Japan_virus_complete_genome	AB287439.1_Honeysuckle_yellow_vein_virus_DNA_complete_genome_isolate__Honeysuckle_Ibaraki	AB236323.1_Honeysuckle_yellow_vein_mosaic_virus[Japan_Miyazaki_2000]_DNA_complete_genome	AB178949.1_Honeysuckle_yellow_vein_Kagoshima_virus_DNA_complete_genome_isolate__KG5TOB	AB236321.1_Honeysuckle_yellow_vein_virus[Japan_Fukui_2000]_DNA_complete_genome	AM503104.1_Malvastrum_leaf_curl_Guangdong_virus_complete_genome_isolate_FJ3	FJ712189.1_Malvastrum_leaf_curl_virus_segment_A_complete_sequence
[truncated: 53 more columns]
