# Supplementary material for: Olea Europaea Geminivirus: A Novel Bipartite Geminivirid Infecting Olive Trees
Source: Viruses. 2021 Mar 15;13(3):481. doi: 10.3390/v13030481 (PMC8000510; doi:10.3390/v13030481)
Supplement: Supplementary file 1 [file viruses-13-00481-s001.zip › Supplementary table 3 - Survey.xlsx]

## Sheet: Survey
OEGV field survey of olive trees. For each sample, it has been indicated the sample ID, the province where it was collected, the location and the results obtained using the two sets of diagnostic primers
Progressive	Sample ID	Province	Location	DNA-A (AC1 F/R 580 nt)	DNA-B (BC1 F/R 322 nt)
1	1 BA	BARI	LOCOROTONDO	-	-
2	2 BA	BARI	MONOPOLI	+	+
3	3 BA	BARI	ALBEROBELLO	+	+
4	4 BA	BARI	ALBEROBELLO	+	+
5	5 BA	BARI	ALBEROBELLO	+	+
6	44BA1	BARI	CASTELLANA GROTTE	+	+
7	44BA2	BARI	CASTELLANA GROTTE	+	+
8	44BA3	BARI	CASTELLANA GROTTE	+	+
9	44BA4	BARI	CASTELLANA GROTTE	+	+
10	44BA5	BARI	CASTELLANA GROTTE	+	+
11	44BA6	BARI	CASTELLANA GROTTE	+	+
12	67BA7	BARI	ALBEROBELLO	+	+
13	67BA8	BARI	ALBEROBELLO	-	-
14	1A	BARI	BARI	+	+
15	2D	BARI	BARI	+	+
1	1 BR	BRINDISI	CISTERNINO	+	+
2	2 BR	BRINDISI	FASANO	+	+
3	3 BR	BRINDISI	FASANO	+	+
4	4 BR	BRINDISI	CEGLIE MESSAPICA	+	+
5	5 BR	BRINDISI	FASANO	+	+
6	42BR1	BRINDISI	FASANO	+	+
7	42BR2	BRINDISI	CEGLIE MESSAPICA	+	+
8	65BR3	BRINDISI	CAROVIGNO	+	+
9	65BR4	BRINDISI	CAROVIGNO	+	+
10	65BR5	BRINDISI	CAROVIGNO	+	+
11	65BR6	BRINDISI	OSTUNI	+	+
12	31BR7	BRINDISI	CISTERNINO	+	+
13	45BR8	BRINDISI	OSTUNI	+	+
14	45BR9	BRINDISI	FASANO	-	-
15	45BR10	BRINDISI	OSTUNI	+	+
16	54BR11	BRINDISI	CEGLIE MESSAPICA	+	+
17	54BR12	BRINDISI	CAROVIGNO	+	+
18	54BR13	BRINDISI	CISTERNINO	+	+
19	54BR14	BRINDISI	OSTUNI	+	+
20	54BR15	BRINDISI	CISTERNINO	+	+
1	1 TA	TARANTO	PALAGIANO	+	+
2	2 TA	TARANTO	MARTINA FRANCA	+	+
3	3 TA	TARANTO	PALAGIANO	+	+
4	4 TA	TARANTO	SAN GIORGIO IONICO	+	+
5	5 TA	TARANTO	CRISPIANO	+	+
6	31TA1	TARANTO	MASSAFRA	+	+
7	31TA2	TARANTO	MASSAFRA	+	+
8	65TA3	TARANTO	STATTE	+	+
9	65TA4	TARANTO	MASSAFRA	+	+
10	65TA5	TARANTO	MASSAFRA	+	+
11	31TA6	TARANTO	MASSAFRA	+	+
12	31TA7	TARANTO	MASSAFRA	+	+
13	45TA8	TARANTO	CRISPIANO	+	+
14	45TA9	TARANTO	MASSAFRA	-	-
15	45TA10	TARANTO	MOTTOLA	+	+
16	54TA11	TARANTO	CRISPIANO	+	+
17	54TA12	TARANTO	GROTTAGLIE	+	+
18	54TA13	TARANTO	MARTINA FRANCA	+	+
19	54TA14	TARANTO	MASSAFRA	-	-
20	54TA15	TARANTO	CRISPIANO	+	+
